# Supplementary material for: Pt NPs immobilized on core–shell magnetite microparticles: novel and highly efficient catalysts for the selective aerobic oxidation of ethanol and glycerol in water
Source: Royal Society of Chemistry journal article supplement (doi:10.1039/c5dt00779h), 2015-01-01
Supplement: c5dt00779h1.pdf [file c5dt00779h1.pdf]

## Supplementary Information

Pt NPs immobilized on core-shell magnetite microparticles: a novel and highly-efficient catalyst for the selective aerobic oxidation of ethanol and glycerol in water

Yu Long, Kun Liang, Jianrui Niu, Bing Yuan, Jiantai Ma\*

State Key Laboratory of Applied Organic Chemistry, College of Chemistry and Chemical Engineering, Lanzhou University, Lanzhou Gansu 730000, PR China.

E-mail address: [majiantai@lzu.edu.cn](mailto:majiantai@lzu.edu.cn)

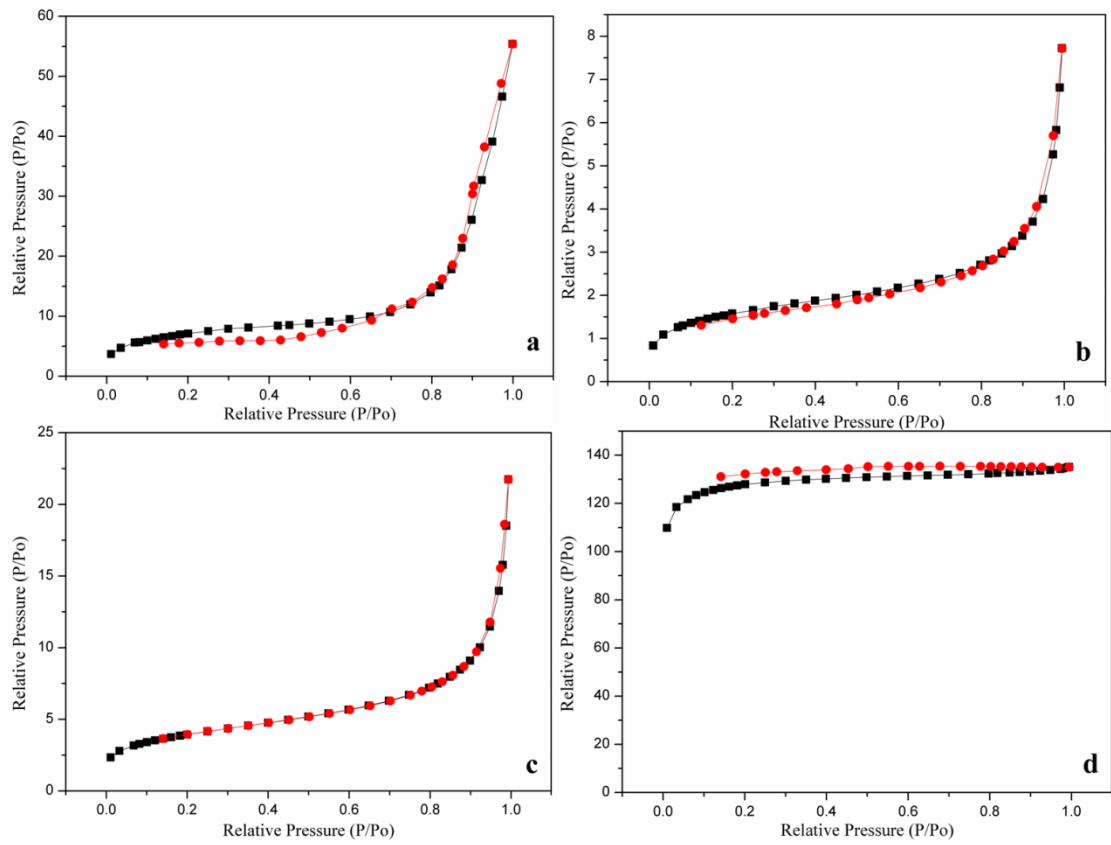

Fig. S1 Nitrogen adsorption–desorption isotherms the catalysts (a), Pt/Fe<sub>3</sub>O<sub>4</sub>@PPy; (b), Pt/Fe<sub>3</sub>O<sub>4</sub>@C; (c), Pt/Fe<sub>3</sub>O<sub>4</sub>@SiO<sub>2</sub>; (d), Pt/ C.

Table S1 Analytical, textural, porosity data and catalytic activities of different catalysts<sup>a</sup>.

| Catalyst                                            | Mass fraction of Pt (%) | BET surface area (m <sup>2</sup> g <sup>-1</sup> ) | Acetic acid yield (%) | Glyceric acid yield (%) |
|-----------------------------------------------------|-------------------------|----------------------------------------------------|-----------------------|-------------------------|
| Pt/Fe <sub>3</sub> O <sub>4</sub> @PPy              | 4.52%                   | 24.8449                                            | 88                    | 55.4                    |
| Pt/Fe <sub>3</sub> O <sub>4</sub> @C                | 2.89%                   | 5.4265                                             | 85                    | 53.1                    |
| Pt/Fe <sub>3</sub> O <sub>4</sub> @SiO <sub>2</sub> | 1.17%                   | 13.5121                                            | 56                    | 34.5                    |
| Pt/C                                                | 5%                      | 387.7301                                           | 82                    | 47.1                    |

<sup>a</sup>the amount of added platinum in the oxidation reactions are the same (i.e. alcohol/platinum = 200 mol/mol)
